# Supplementary material for: A Cohesin Subunit Variant Identified from a Peripheral Sclerocornea Pedigree
Source: Hindawi journal article supplement (doi:10.1155/2019/8781524), 2019-11-12
Supplement: f1 [file 8781524.f1.pdf]

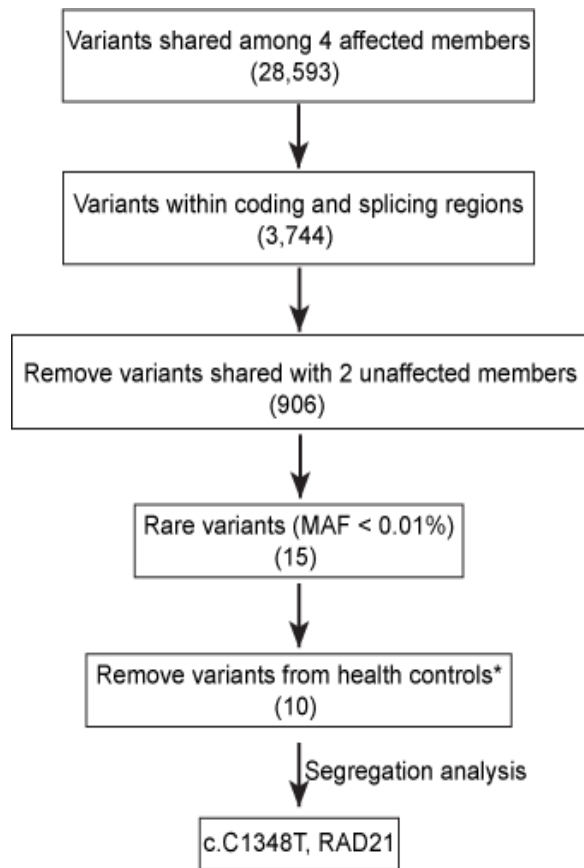

**Supplementary Figure 1** The analysis pipeline to process WES to identify sclerocornea associated mutations from the pedigree. 3,744 variants within coding and splicing regions were obtained from 28,593 variants that are shared among 4 affected members. After removing the variants that are shared with 2 unaffected members, 906 variants were subjected to the next step. From these 906 variants, 15 rare variants were identified and among them, 5 were removed since they are shared among health individuals from a published cohort. After segregation analysis, c.C1348T in *RAD21* was chosen for studying its association with sclerocornea.

**Supplementary Table 1** Information of the 10 candidate variants resulting from filtering of exome sequencing data for the peripheral sclerocornea pedigree.

| No. | Gene Symbol     | mRNA         | cDNA change         | dbSNP        | Protein change  | Clinical Significance | Reported Population |
|-----|-----------------|--------------|---------------------|--------------|-----------------|-----------------------|---------------------|
| 1   | <i>RAD21</i>    | NM_006265    | c.C1348T            | rs1301282588 | p. R450C        | NA                    | NON                 |
|     |                 | NM_001142299 | c.C11T              |              |                 |                       |                     |
| 2   | <i>SQSTM1</i>   | NM_003900    | c.C263T             | rs763040103  | p.S88F          | NA                    | NON                 |
|     |                 | NM_001142298 | c.C11T              |              |                 |                       |                     |
| 3   | <i>RAPGEF5</i>  | NM_012294    | c.141_143del        | NA           | p.47_48del      | NA                    | NA                  |
| 4   | <i>PRICKLE4</i> | NM_013397    | c.863_864insTCT     | rs76510495   | p.L288delinsLL  | NA                    | NA                  |
|     |                 | NM_001147    | c.T704C             |              |                 |                       |                     |
| 5   | <i>ANGPT2</i>   | NM_001118888 | c.T548C             | rs149699486  | p.V183A         | NA                    | NON                 |
|     |                 | NM_001118887 | c.T704C             |              |                 |                       |                     |
| 6   | <i>MNT</i>      | NM_020310    | c.695_695+1insGT    | rs58552657   |                 | NA                    | NA                  |
| 7   | <i>REXO1</i>    | NM_020695    | c.1741_1742insTCC   | rs3052937    | p.S581delinsSS  | NA                    | NA                  |
| 8   | <i>OR7G3</i>    | NM_001001958 | c.922_923insATACC   | rs3029651    | p.I308fs        | NA                    | AF*                 |
| 9   | <i>FAM98C</i>   | NM_174905    | c.1047_1048insAAG   | rs59917662   | p.K349delinsKK  | NA                    | NON                 |
|     |                 | NM_012267    | c.76_77insGGCGGCGGC |              |                 |                       |                     |
| 10  | <i>HSPBP1</i>   | NM_001130106 | c.76_77insGGCGGCGGC | rs10701478   | p.G26delinsGGGG | NA                    | NON                 |
|     |                 |              |                     |              |                 |                       |                     |

NA: not available in dbSNP;

NON: non-association in dbSNP;

\*AF: African 0.711, East Asian 0.365, Europe 0.314, South Asian 0.34, American 0.24.

**Supplementary Table 2** Summary of original exome sequencing data of the peripheral sclerocornea pedigree.

| <b>Data</b>                                        | <b>I-1</b> | <b>II-1</b> | <b>II-2</b> | <b>II-3</b> | <b>II-4</b> | <b>II-5</b> |
|----------------------------------------------------|------------|-------------|-------------|-------------|-------------|-------------|
| Number of raw reads (M)                            | 58.9       | 92.5        | 80.0        | 62.2        | 77.0        | 70.0        |
| Average read length (bp)                           | 101        | 101         | 101         | 101         | 101         | 101         |
| Raw data yield (Gb)                                | 5.9        | 9.3         | 8.1         | 6.3         | 7.8         | 7.1         |
| Number of reads mapped to the genome (M)           | 58.8       | 92.2        | 79.8        | 62.0        | 76.8        | 69.8        |
| Fraction of uniquely mapped bases on target (%)    | 87.6%      | 87.5%       | 87.7%       | 87.7%       | 87.8%       | 87.2%       |
| Data mapped to target region (M)                   | 34.4       | 53.5        | 46.2        | 36.2        | 45.1        | 40.4        |
| Mean depth of target region (fold)                 | 44.7       | 69.6        | 60.2        | 47.0        | 58.8        | 52.4        |
| Coverage of target region (%)                      | 95.9%      | 96.1%       | 96.1%       | 95.8%       | 96.0%       | 96.1%       |
| Target region with depth of more than 10 times (%) | 90.0%      | 92.0%       | 91.7%       | 90.4%       | 91.4%       | 91.1%       |

**Supplementary Table 3** Summary of detected variants of the peripheral sclerocornea pedigree.

| <b>Variants</b>              | <b>I-1</b> | <b>II-1</b> | <b>II-2</b> | <b>II-3</b> | <b>II-4</b> | <b>II-5</b> |
|------------------------------|------------|-------------|-------------|-------------|-------------|-------------|
| Number of SNPs               | 76016      | 77937       | 77883       | 76800       | 77698       | 77649       |
| Number of coding SNPs        | 20840      | 20572       | 20740       | 21087       | 20834       | 20928       |
| Number of synonymous SNPs    | 10812      | 10719       | 10804       | 10981       | 10804       | 10866       |
| Number of nonsynonymous SNPs | 9475       | 9325        | 9402        | 9556        | 9483        | 9506        |
| Number of Indels             | 7509       | 8170        | 8032        | 7610        | 7996        | 7754        |
| Number of coding Indels      | 414        | 438         | 427         | 433         | 433         | 433         |
